# Supplementary material
Source: PubMed Central journal article supplement (PMC6058790)
Supplement: 2018_193714-Disclosures_and_Contributions.pdf [file 2018_193714-Disclosures_and_Contributions.pdf]

Haematologica  
HAEMATOL/2018/193714  
Version 1

Defining the Elusive Boundaries of Chronic Active Epstein Barr Virus  
Infection

Sebastian Fernandez-Pol, Oscar Silva, and Yasodha Natkunam

Disclosures: None

Contributions: All authors contributed to writing the manuscript.
